# Supplementary material for: CIP2A is an Oct4 target gene involved in head and neck squamous cell cancer oncogenicity and radioresistance
Source: PubMed Central journal article supplement (PMC4381584; doi:10.18632/oncotarget.2670), 2014-12-05
Supplement: oncotarget-06-144-s001.pdf [file oncotarget-06-144-s001.pdf]

**SUPPLEMENTARY FIGURES AND TABLES**

Number of positive cells/seminiferous tubule 0 and 144 hours after 4 Gy X-irradiation

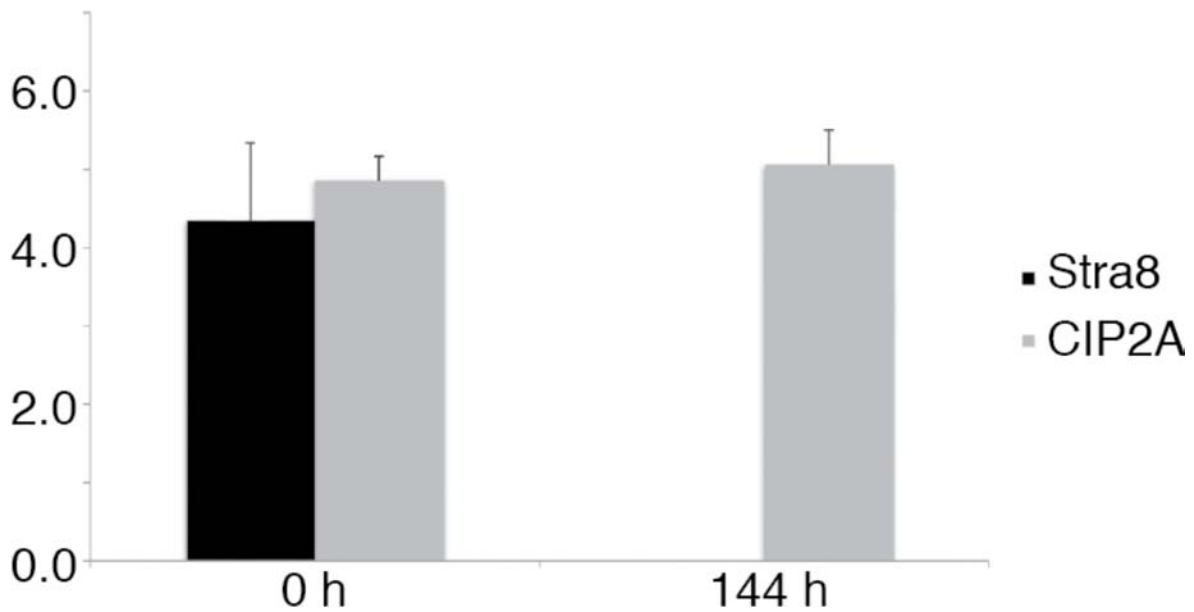

Supplementary Figure S1: Number of Stra8 and CIP2A positive cells/seminiferous tubule 0 and 144 hours after 4 Gy X-irradiation.

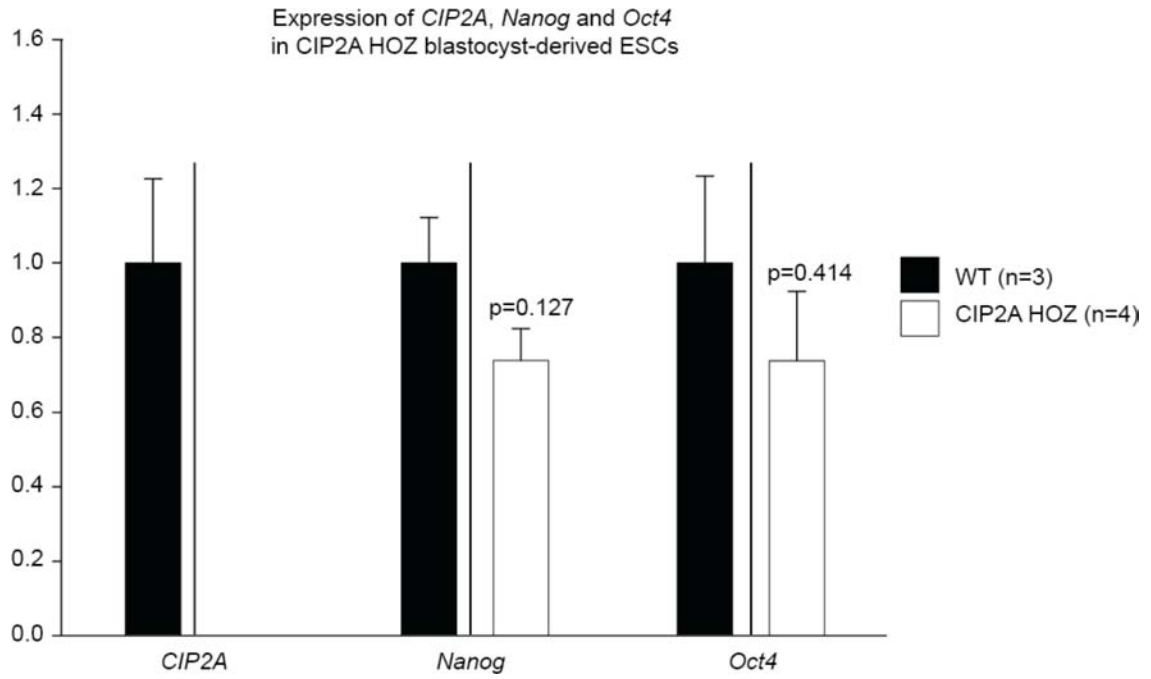

Supplementary Figure S2: mRNA expression of *CIP2A*, *Nanog* and *Oct4* in CIP2A HOZ and wild type blastocyst-derived embryonic stem cells.

Database: TRANSFAC MATRIX TABLE, Rel.3.3 06-01-1998  
 Query: CIP2A promoter  
 Taxonomy: Vertebrate  
 Threshold: 90.0 poi

ATGTTGCTTT CTTAATGAGG TCACCTTCCC ATTTCCCTTA  
 TCAATTACCA entry score  
 ----->

<A  
 HREF=http://www.cbrc.jp/htbin/bget\_tfmatrix?M00137>M0  
 0137</A> Oct-1 93.1

&lt;-----

----- <A

-1650

ATGTTGCTTTCTTAATGAGGTCACCTTCCCATTTCCTTATCAATTACCAACATTATT  
 CTAGAGTAATAACGTCTATTTTCTCTTTATATCATTTTCTTACTTATTTATTTGTG  
 TTTATTTATTTGGTTCCTACCAAAATGTAAGTTGCATGCCAGTAGTATTTTGT  
 TTTCACTGAGTCTATTTGTGTCTAGAAAAGTGCTTAGCACATTGTAGATTCTCAATGA  
 ACTACTTATTGAATGAACAGTCTATGAACCAGGTATCTCCCTTGGCCAGATTTTACC  
 TAATGAAGATTCTGCAGCAGTGAGAAGTGCCTAGAGTCACATCGTCAAAGGTGGAG  
 CTAGAACTGTGAAGCAACCTGGCTCTCTACTCTTTACCACTGCTGCATGTTACTGCAT  
 GGTGCCCTCTCATTTATGTGGTGAATTTCAAAAGTACTATTTTGTATGTTTCCCTTAC  
 TAGACAGTTCCCTCGCAGCAGGGGATACTACTTCATCTCTGTTCCCTGACTGGCAGTT  
 TCTAACCCATGTTACACGCTCTATAATTGTTTACGGAATGAATGAAAGCATAAAATGA  
 ACACACAAGCTACCCAAAGATTTTACATGAATGTCCCAACTGGTTAAATCATTTTT  
 ATCTTTGAGATTTAACTTTTATAAAAAACAAAACAAAACACCAAACCTGTCTTCA  
 AAAATCTAGTAATTCAAAAAATTTCTTTGAAAGTAAAAAACATGATTTCTGATAA  
 ACGATTTAATTAATGGAATGTACCCTATTCTTACAATTTCTACATCCTGGTTTTT  
 AAAGCTTTATTTCGACGTTAGGAAATATTAAGCAAAAAGCTCCAAAACAGTAACTGA  
 CTCGCTTCATTACATACACATGCAATAATTAAGCTATCTCCGATTTAAAAAACGC  
 AAATAATAGTGCCATTTTCGTAGACATCGAGAATTATAAAACAATCAATCATGCCAG  
 AGAGAAAACAGACACCTTCACTTACAAAAACTGACGCTAACGAGTAACACCCCTCCGGA  
 GCAATACCTGGCCCAGGGTCAGCAGGAGGTAGTCTTCTCGAATAAATGTGACAAATA  
 CTTTGGTCAAGGCATGACTAATTTGCCACATAATGCCAATAGGTTGACTCTGAGAAA  
 CTACCATCCCCGGCAGAAGGGGGGGTGTAGGAGAGATTTAAAAACGAGGCCCTC  
 CCAGCCGCTCAAATCTAGGGCCAAGATTTCTTCTCCTCAGAGCTCCTCACCGTGT  
 CTAGACTAGGGGCAAGCGACATTTCTCAGGTAGAGGATGACGCACAAACGAAAAAC  
 TGGCCATCCAACATGAAGGACGAGGAAGCGCACGAAATCAGAGCGCACAGCTGAGTG  
 AGGAATCCCCCTTCTCCTAACCGATTCTCTCCGAGAAATCGCGAGATTTCTCGCCT  
 TCACGGGATCTCAGGCCGAAACCTCGGGCTCTCAGACGAGGGTGGGTTAGCGGGG  
 GCAGCTCCCAACCCCGTCTGGACCCACAAATCACCTCGACCCCTGGCCCACCCGGC  
 CGTCACCGAGAACGGTCCCCTAGGGTGCCTAGGGACTTCCGGAGCCCGACCGGATCCG  
 GAAGCTTCTGAGAGCGAGGGGTGGGGCCGAAATCAAAAAAGC+1

Supplementary Figure S3: Bioinformatics analysis of -1802 bp CIP2A promoter fragment identified putative octamer binding elements at region -1650 to -1600 bp.

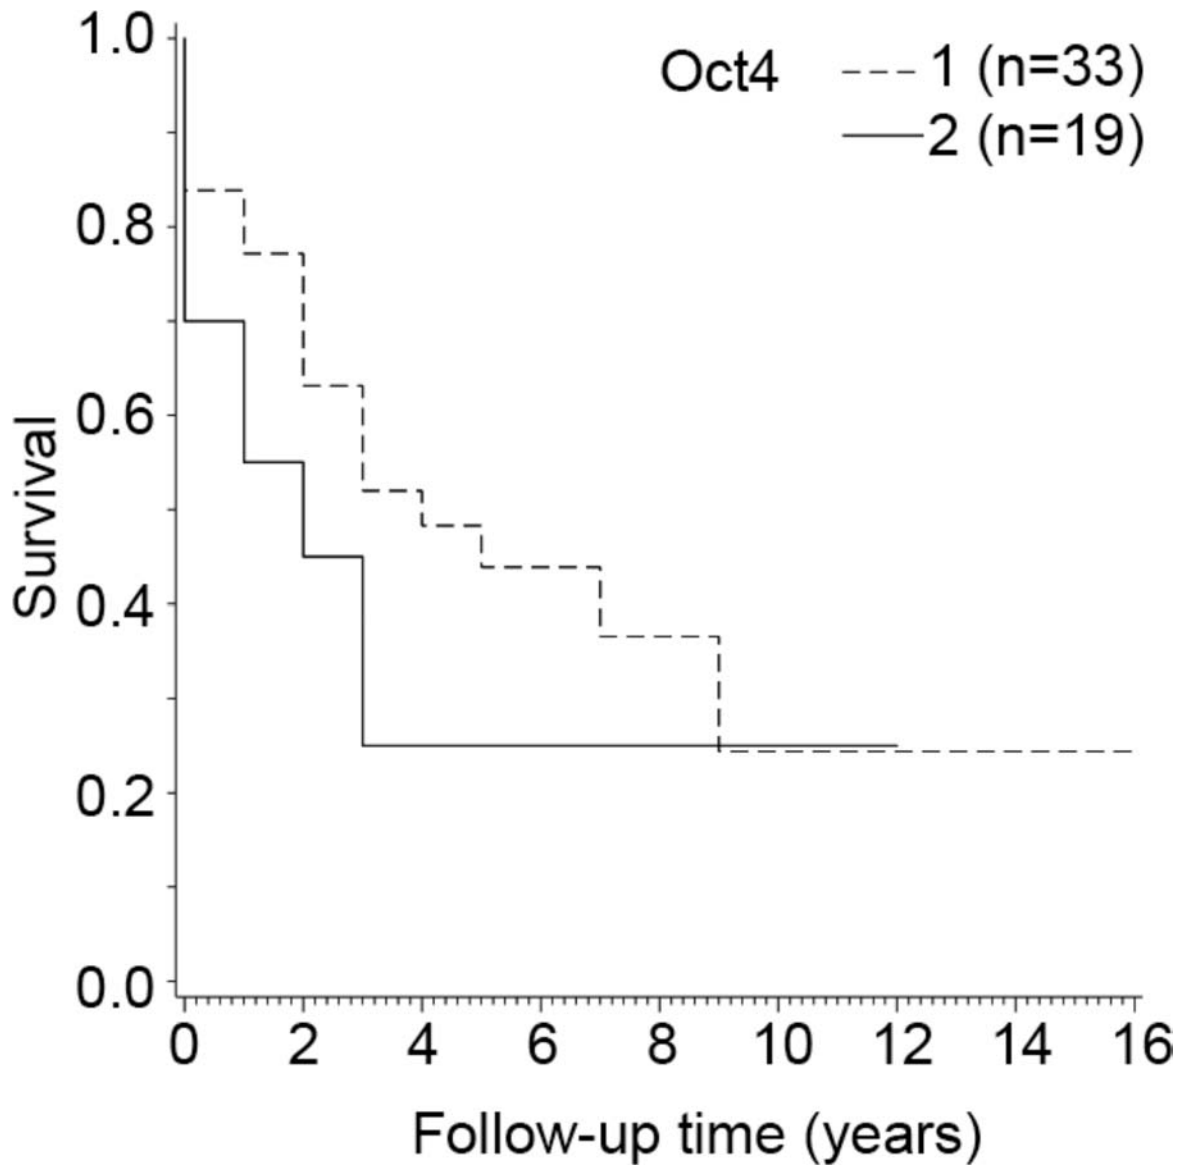

**Supplementary Figure S4: The Kaplan–Meier 5 year overall survival curve from the HNSCC material ( $n = 52$ ).** The higher curve (1) represents the patients with a negative Oct4 expressing tumor, and the lower curve (2) represents HNSCC patients having strong Oct4 expression.

**Supplementary Table S1. Primer design, accession numbers, annealing temperatures and amplicon lengths.** Letters “m” and “h” in front of gene name refer to genes of mouse or human origin, respectively.

| <i>Gene</i>   | <i>Accession number</i> | <i>Annealing temperature</i> | <i>Primers</i>                                                    | <i>Product length</i> |
|---------------|-------------------------|------------------------------|-------------------------------------------------------------------|-----------------------|
| <i>mCD9</i>   | NM_007657               | 56°C                         | 5'-TGCAGTGCTTGCTATTGGAC-3'<br>5'-GGCGAATATCACCAAGAGGA-3'          | 219 bp                |
| <i>hCIP2A</i> | NM_020890               | 57.5°C                       | 5'-GCTTGAAGTCCTTGCTCCTG-3'<br>5'-CAAGGCAACTCAAGCATTCA-3'          | 161 bp                |
| <i>mCIP2A</i> | NM_172616               | 57°C                         | 5'-GCGCCATGTACTCAGTCAGA-3'<br>5'-AGGAAGCAGAAGGGTCCACAA-3'         | 234 bp                |
| <i>hc-KIT</i> | NM_000222               | 60°C                         | 5'-TCATGGTCGGATCACAAAGA-3'<br>5'-AGGGGCTGCTTCCTAAAGAG-3'          | 205 bp                |
| <i>mc-Kit</i> | NM_021099               | 56°C                         | 5'-ATCCCGACTTTGTCAGATGG-3'<br>5'-AAGGCCAACCCAGGAAAAGTT-3'         | 192 bp                |
| <i>hNANOG</i> | NM_024865               | 57.5°C                       | 5'-GATTTGTGGGCTGAAGAAA-3'<br>5'-AAGTGGGTTGTTTGCCTTTG-3'           | 154 bp                |
| <i>hOCT4</i>  | NM_002701               | 64°C                         | 5'-TGGAGAAGGAGAAGCTGGAGCAAAA-3'<br>5'-GGCAGATGGTCGTTTGGCTGAATA-3' | 185 bp                |
| <i>mOct4</i>  | NM_013633               | 64°C                         | 5'-CACGAGTGGAAAGCAACTCA-3'<br>5'-AGATGGTGGTCTGGCTGAAC-3'          | 245 bp                |
| <i>mPLZF</i>  | NM_001033324            | 59°C                         | 5'-AACGGTTCCTGGACAGTTG-3'<br>5'-CCCACACAGCAGACAGAAGA-3'           | 172 bp                |
| <i>mPpia</i>  | NM_008907               | 63°C                         | 5'-CATCCTAAAGCATAACAGGTCTG-3'<br>5'-TCCATGGCTTCCACAATGTT-3'       | 164 bp                |
| <i>hRPL19</i> | NM_000981               | 55°C                         | 5'-AGGCACATGGGCATAGGTAA-3'<br>5'-CCATGAGAATCCGCTTGTTT-3'          | 198 bp                |
| <i>mRPL19</i> | NM_009078               | 55°C                         | 5'-GGACAGAGTCTTGATGATCTC-3'<br>5'-CTGAAGGTCAAAGGGAATGTG-3'        | 195 bp                |
| <i>mStra8</i> | NM_009292               | 57°C                         | 5'-ATGCAATGTTGCTGAAGTGC-3'<br>5'-GGAAGCAGCCTTCTCAATG-3'           | 161 bp                |

**Supplementary Table S2. Used siRNA sequences**

| siRNA    | 5'←3'                   |
|----------|-------------------------|
| CIP2A    | CUGUGGUUGUGUUUGCACU(TT) |
| siOct4-1 | GGAGAAGCUGGAGCAAAC(TT)  |
| siOct4-2 | GCCGGGCUGGGUUGAUCCU(TT) |
| Nanog-2  | TTGGTTTAAGTTCAAATGA(AT) |
| Nanog-4  | CTGGAGGTCCTATTTCTCT(AA) |
| Sox2-4   | TAGGACAGTTGCAAACGTG(AA) |
| Sox2-5   | CAGCTCGCAGACCTACATG(AA) |
